# Supplementary material for: Proteomic Profile of Saliva in Parkinson’s Disease Patients: A Proof of Concept Study
Source: MDPI journal article supplement (doi:10.3390/brainsci11050661), 2021-05-18
Supplement: s1 [file s1]

## Supplementary

**Table S1.** The protein clusters with fold changes >1.5 or <-1.5 in Parkinson patients (PD) versus healthy control (HC) saliva samples. Proteins with significantly different expression between PD and HC patients are bolded. Orange proteins have higher expression in PD group than HC group. Blue proteins have lower expression in PD group than HC group.

| <i>Protein</i>                                                                                                        | <i>p-value</i> | <i>fold<br/>change</i> | <i>Description</i>                                  |
|-----------------------------------------------------------------------------------------------------------------------|----------------|------------------------|-----------------------------------------------------|
| <b>Q96FQ6</b>                                                                                                         | <b>0.0002</b>  | <b>-10.47</b>          | <b>Protein S100-A16</b>                             |
| A6NMY6 + P07355                                                                                                       | 0.875          | -4.4                   | Putative annexin A2-like (Annexin A2)               |
| Q9HD89                                                                                                                | 0.101          | -4.04                  | Resistin                                            |
| Q5VT79 + P13928                                                                                                       | 0.36           | -3.84                  | Annexin A8-like protein 1<br>Annexin A8             |
| Q9BYZ2                                                                                                                | 0.427          | -3.72                  | L-lactate dehydrogenase A-like 6B                   |
| <b>Q92747</b>                                                                                                         | <b>0.043</b>   | <b>-3.57</b>           | <b>Actin-related protein 2/3 complex subunit 1A</b> |
| Q8N1N4                                                                                                                | 0.979          | -3.15                  | Keratin, type II cytoskeletal 78                    |
| Q9BTM1+ P0C0S8+<br>Q7L7L0+ P20671+<br>Q99878+ Q16777+<br>Q93077+ Q96KK5+<br>Q6FI13+ P04908+ O75367+<br>Q8IUE6+ P16104 | 0.295          | -2.83                  | Histone H2A subtypes                                |
| P14923 + P35222                                                                                                       | 0.424          | -2.83                  | Junction plakoglobin                                |
| P49419                                                                                                                | 0.171          | -2.81                  | Alpha-aminoadipic semialdehyde dehydrogenase        |
| Q14764                                                                                                                | 0.818          | -2.73                  | Major vault protein                                 |
| P59665 + P59666                                                                                                       | 0.934          | -2.64                  | Neutrophil defensin 1                               |
| P53675 + Q00610                                                                                                       | 0.553          | -2.6                   | Clathrin heavy chain 1                              |
| P26447                                                                                                                | 0.402          | -2.57                  | Protein S100-A4                                     |
| P15559                                                                                                                | 0.373          | -2.53                  | NAD(P)H dehydrogenase [quinone] 1                   |
| P20160                                                                                                                | 0.752          | -2.46                  | Azurocidin                                          |
| P04196                                                                                                                | 0.897          | -2.43                  | Histidine-rich glycoprotein                         |
| P04083                                                                                                                | 1              | -2.31                  | Annexin A1                                          |
| Q13835                                                                                                                | 0.464          | -2.28                  | Plakophilin-1                                       |
| P02751                                                                                                                | 0.059          | -2.27                  | Fibronectin                                         |
| <b>Q9UM07</b>                                                                                                         | <b>0.254</b>   | <b>2.25</b>            | <b>Protein-arginine deiminase type-4</b>            |
| P28066                                                                                                                | 0.255          | -2.23                  | Proteasome subunit alpha type-5                     |
| P48668+ P04259+ O95678+<br>P02538                                                                                     | 1              | -2.21                  | Keratin, type II cytoskeletal 6C, 6B 6A             |
| P15924                                                                                                                | 0.964          | -2.21                  | Desmoplakin                                         |
| Q86VP6                                                                                                                | 0.369          | -2.16                  | Cullin-associated NEDD8-dissociated protein 1       |

|                          |       |       |                                                                                   |
|--------------------------|-------|-------|-----------------------------------------------------------------------------------|
| Q9HCY8                   | 0.442 | -2.16 | Protein S100-A14                                                                  |
| Q13421                   | 0.292 | -2.14 | Mesothelin                                                                        |
| P19013                   | 1     | -2.13 | Keratin, type II cytoskeletal 4                                                   |
| P22735                   | 0.468 | -2.13 | Protein-glutamine gamma-glutamyltransferase K                                     |
| P50995                   | 0.123 | -2.12 | Annexin A11                                                                       |
| P13646                   | 1     | -2.12 | Keratin, type I cytoskeletal 13                                                   |
| P06731                   | 0.187 | -2.1  | Carcinoembryonic antigen-related cell adhesion molecule 5                         |
| P09488 + Q03013          | 0.384 | -2.06 | Glutathione S-transferase Mu 1                                                    |
| P22061                   | 0.586 | 2.05  | Protein-L-isoaspartate(D-aspartate) O-methyltransferase                           |
| Q9H1E3                   | 0.665 | -2.04 | Nuclear ubiquitous casein and cyclin-dependent kinase substrate 1                 |
| P08865                   | 0.658 | -2    | 40S ribosomal protein SA                                                          |
| P10809                   | 0.896 | -1.97 | 60 kDa heat shock protein, mitochondrial                                          |
| P48637                   | 0.493 | -1.94 | Glutathione synthetase                                                            |
| P13647 + Q5XKE5          | 1     | -1.93 | Keratin, type II cytoskeletal 5,<br>Keratin, type II cytoskeletal 79              |
| P38646                   | 0.100 | -1.93 | Stress-70 protein, mitochondrial                                                  |
| Q14103                   | 0.191 | -1.92 | Heterogeneous nuclear ribonucleoprotein D0                                        |
| P62136 + P62140 + P36873 | 0.735 | -1.92 | Serine/threonine-protein phosphatase PP1-alpha, beta and gamma catalytic subunits |
| P08133                   | 0.521 | -1.9  | Annexin A6                                                                        |
| P80511                   | 0.78  | -1.9  | Protein S100-A12                                                                  |
| P49913                   | 0.944 | -1.84 | Cathelicidin antimicrobial peptide                                                |
| P49368                   | 0.809 | 1.83  | T-complex protein 1 subunit gamma                                                 |
| P11216                   | 0.879 | -1.82 | Glycogen phosphorylase, brain form                                                |
| P02808                   | 1     | 1.81  | Statherin                                                                         |
| Q14624                   | 0.277 | -1.79 | Inter-alpha-trypsin inhibitor heavy chain H4                                      |
| O95833                   | 0.444 | -1.79 | Chloride intracellular channel protein 3                                          |
| P48163                   | 0.266 | -1.78 | NADP-dependent malic enzyme                                                       |
| P12429                   | 0.956 | -1.78 | Annexin A3                                                                        |
| P05109                   | 0.999 | -1.77 | Protein S100-A8                                                                   |
| P20810                   | 0.922 | -1.77 | Calpastatin                                                                       |
| P09429 + B2RPK0          | 0.601 | 1.76  | High mobility group protein B1<br>Putative high mobility group protein B1-like 1  |
| Q5D862                   | 0.139 | -1.75 | Filaggrin-2                                                                       |
| P23141                   | 0.687 | -1.75 | Liver carboxylesterase 1                                                          |
| P03973                   | 0.997 | -1.74 | Antileukoproteinase                                                               |
| P00352 + P51648          | 0.688 | -1.73 | Retinal dehydrogenase 1                                                           |
| P00441                   | 0.102 | -1.72 | Superoxide dismutase [Cu-Zn]                                                      |
| P08779                   | 0.512 | -1.71 | Keratin, type I cytoskeletal 16                                                   |

|                                                                                                                               |              |              |                                                                    |
|-------------------------------------------------------------------------------------------------------------------------------|--------------|--------------|--------------------------------------------------------------------|
| P08727                                                                                                                        | 0.949        | -1.71        | Keratin, type I cytoskeletal 19                                    |
| P06702                                                                                                                        | 1            | -1.71        | Protein S100-A9                                                    |
| P25786                                                                                                                        | 0.921        | -1.71        | Proteasome subunit alpha type-1                                    |
| Q14134                                                                                                                        | 0.726        | -1.7         | Tripartite motif-containing protein 29                             |
| P80723                                                                                                                        | 0.987        | -1.7         | Brain acid soluble protein 1                                       |
| Q9HC38                                                                                                                        | 0.298        | -1.7         | Glyoxalase domain-containing protein 4                             |
| O00748                                                                                                                        | 0.772        | -1.68        | Cocaine esterase                                                   |
| Q6P4A8                                                                                                                        | 0.791        | -1.68        | Phospholipase B-like 1                                             |
| P02749                                                                                                                        | 0.103        | -1.68        | Beta-2-glycoprotein 1                                              |
| P10163                                                                                                                        | 1            | -1.67        | Basic salivary proline-rich protein 4                              |
| Q9UKR3                                                                                                                        | 0.986        | 1.67         | Kallikrein-13                                                      |
| P13667                                                                                                                        | 0.497        | -1.67        | Protein disulfide-isomerase A4                                     |
| P11215                                                                                                                        | 0.431        | -1.67        | Integrin alpha-M                                                   |
| Q08554                                                                                                                        | 0.629        | 1.67         | Desmocollin-1                                                      |
| Q09666                                                                                                                        | 1            | -1.67        | Neuroblast differentiation-associated protein AHNAK                |
| P17987                                                                                                                        | 0.331        | -1.67        | T-complex protein 1 subunit alpha                                  |
| P55072                                                                                                                        | 0.933        | -1.65        | Transitional endoplasmic reticulum ATPase                          |
| P28799                                                                                                                        | 0.331        | -1.65        | Progranulin                                                        |
| P20618                                                                                                                        | 0.196        | -1.65        | Proteasome subunit beta type-1                                     |
| P08246                                                                                                                        | 0.743        | -1.65        | Neutrophil elastase                                                |
| P05164                                                                                                                        | 1            | -1.64        | Myeloperoxidase                                                    |
| P51570                                                                                                                        | 0.738        | 1.64         | Galactokinase                                                      |
| Q01813                                                                                                                        | 0.678        | -1.62        | ATP-dependent 6-phosphofructokinase, platelet type                 |
| Q53FA7                                                                                                                        | 0.399        | -1.62        | Quinone oxidoreductase PIG3                                        |
| P08758                                                                                                                        | 0.147        | -1.61        | Annexin A5                                                         |
| Q9H361+ Q4VXU2 +<br>P11940+ Q13310                                                                                            | 0.730        | -1.61        | Polyadenylate-binding protein 3.1-like,1 and 4                     |
| P17931                                                                                                                        | 0.931        | -1.6         | Galectin-3                                                         |
| P55263                                                                                                                        | 0.216        | -1.59        | Adenosine kinase                                                   |
| Q8TE68                                                                                                                        | 0.203        | -1.59        | Epidermal growth factor receptor kinase substrate 8-like protein 1 |
| <b>O75351</b>                                                                                                                 | <b>0.038</b> | <b>-1.59</b> | <b>Vacuolar protein sorting-associated protein 4B</b>              |
| Q99877+ P06899+<br>Q5QNW6+ P23527+<br>Q99879+ Q16778+<br>P62807+ Q8N257+<br>P33778+ O60814+ P57053+<br>Q99880+ Q93079+ P58876 | 0.958        | -1.59        | Histone H2B subtypes                                               |
| P28676                                                                                                                        | 0.638        | -1.58        | Grancalcin                                                         |
| P02788                                                                                                                        | 1            | -1.57        | Lactotransferrin                                                   |

|                 |       |       |                                                            |
|-----------------|-------|-------|------------------------------------------------------------|
| P35579          | 1     | -1.56 | Myosin-9                                                   |
| P78371          | 0.286 | -1.56 | T-complex protein 1 subunit beta                           |
| O60437          | 0.964 | -1.56 | Periplakin                                                 |
| P27824          | 0.267 | -1.54 | Calnexin                                                   |
| P32320          | 0.055 | -1.54 | Cytidine deaminase                                         |
| O75015 + P08637 | 0.752 | 1.54  | Low affinity immunoglobulin gamma Fc region receptor III-A |
| A0A0C4DH42      | 0.837 | -1.54 | Immunoglobulin heavy variable 3-66                         |
| Q32MZ4          | 0.348 | -1.53 | Leucine-rich repeat flightless-interacting protein 1       |
| P08237 + P17858 | 0.472 | -1.53 | ATP-dependent 6-phosphofructokinase, liver type            |
| P49720          | 0.568 | -1.53 | Proteasome subunit beta type-3                             |
| P04632          | 0.067 | -1.52 | Calpain small subunit 1                                    |
| Q02790          | 0.100 | -1.51 | Peptidyl-prolyl cis-trans isomerase FKBP4                  |
| P19652          | 0.565 | -1.5  | Alpha-1-acid glycoprotein 2                                |
| Q08188          | 1     | -1.5  | Protein-glutamine gamma-glutamyltransferase E              |
| Q13126          | 0.917 | -1.5  | S-methyl-5'-thioadenosine phosphorylase                    |
